# Supplementary material for: Common metal of copper(0) as an efficient catalyst for preparation of nitriles and imines by controlling additives
Source: Royal Society of Chemistry journal article supplement (doi:10.1039/c4cc01389a), 2014-01-01

# Common Metal of Copper (0) as An Efficient Catalyst for Preparation of Nitriles and Imines by Controlling Additives

Jiaqing Wang, Shuanglong Lu, Xueqin Cao, Hongwei Gu\*

College of Chemistry, Chemical Engineering and Materials Science, Soochow University, Suzhou, China 215123

E-mail: hongwei@suda.edu.cn

## Experimental Section

*1. General.* The benzylamine and its derivatives were purchased from Sinopharm Chemical Reagent Co. Ltd. All materials were used without further purification. Scanning electron microscopy (SEM) measurements were performed on a Hitachi S-4700 cold field emission scanning electron microscope operated at 30 KV. The product mixtures were analyzed by GC (VARIAN CP-3800 GC, HP-5 capillary column, FID detector) and GC-MS (VARIAN 450-GC & VARIAN 240-GC) equipped with a CP8944 capillary column (30 m × 0.25 mm) and an FID detector. The NMR spectra were measured on a spectrometer at 400 MHz for  $^1\text{H}$  and 100 MHz for  $^{13}\text{C}$  in  $\text{CDCl}_3$  solution.

*2. Typical catalytic oxidation procedure.* To a reaction tube equipped with a magnetic stirrer an appropriate amount of red copper (10 mg),  $\text{NH}_4\text{Br}$  (98 mg, 1 mmol), benzylamine (109  $\mu\text{L}$ , 1 mmol), and toluene (2 mL) were added. The air in the tube was then exchanged 3 times with 1 atm of  $\text{O}_2$ . Finally, the tube was immersed in an oil bath at 100 °C in a sealed  $\text{O}_2$  system. After stirring for 24 h at 100 °C, the mixture was cooled to room temperature. A sample of the mixture was immediately analyzed by GC and GC-MS. All the reactions were performed for at least 5 times till their differences were within an acceptable error range.

### NMR data of the partial products:

#### 1. 4-cyanophenol

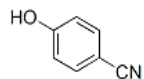

$^1\text{H}$  NMR(400 MHz,  $\text{CDCl}_3$ ):  $\delta$ =7.56-7.54 (d, 2H), 6.94-6.92 (d, 2H), 6.54 (s, 1H).

$^{13}\text{C}$  NMR(100 MHz,  $\text{CDCl}_3$ ):  $\delta$ =103.15, 116.69, 119.47, 134.54, 160.47.

$^1\text{H}$  NMR:

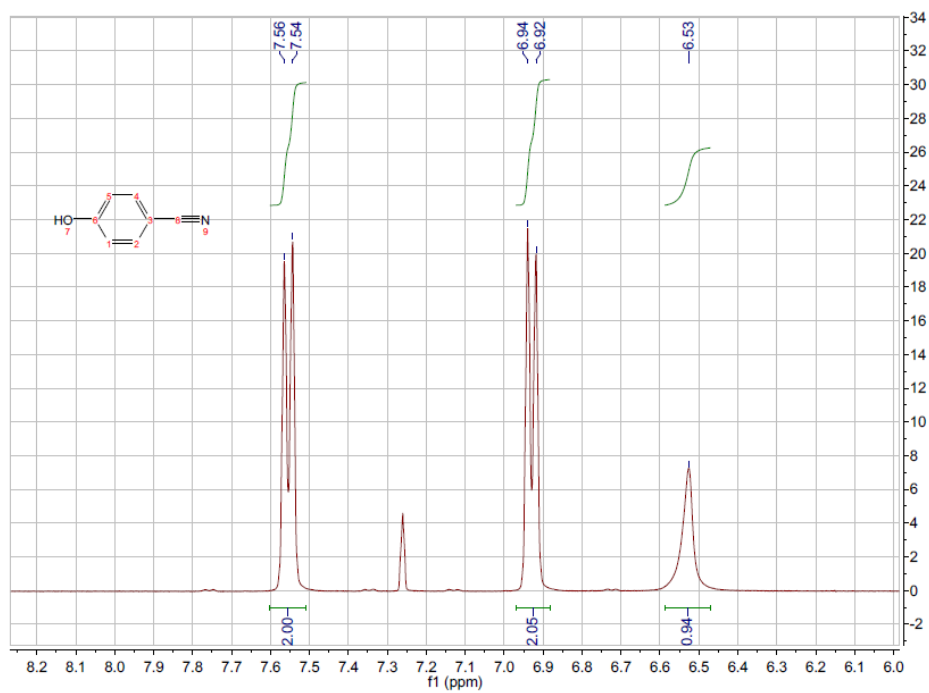

$^{13}\text{C}$  NMR:

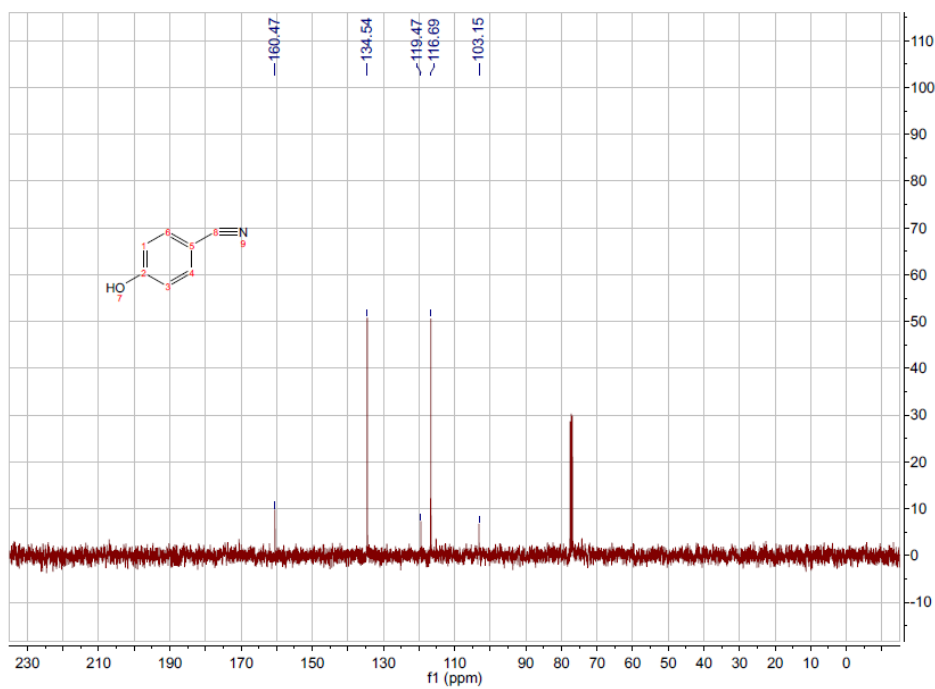

2. 4-bromobenzonitrile

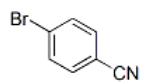

$^1\text{H}$  NMR (400 MHz,  $\text{CDCl}_3$ ):  $\delta$  = 7.65-7.63 (d, 2H), 7.54-7.51 (d, 2H).

$^{13}\text{C}$  NMR (100 MHz,  $\text{CDCl}_3$ ):  $\delta$  = 111.41, 118.27, 128.22, 132.84, 133.62.

$^1\text{H}$  NMR:

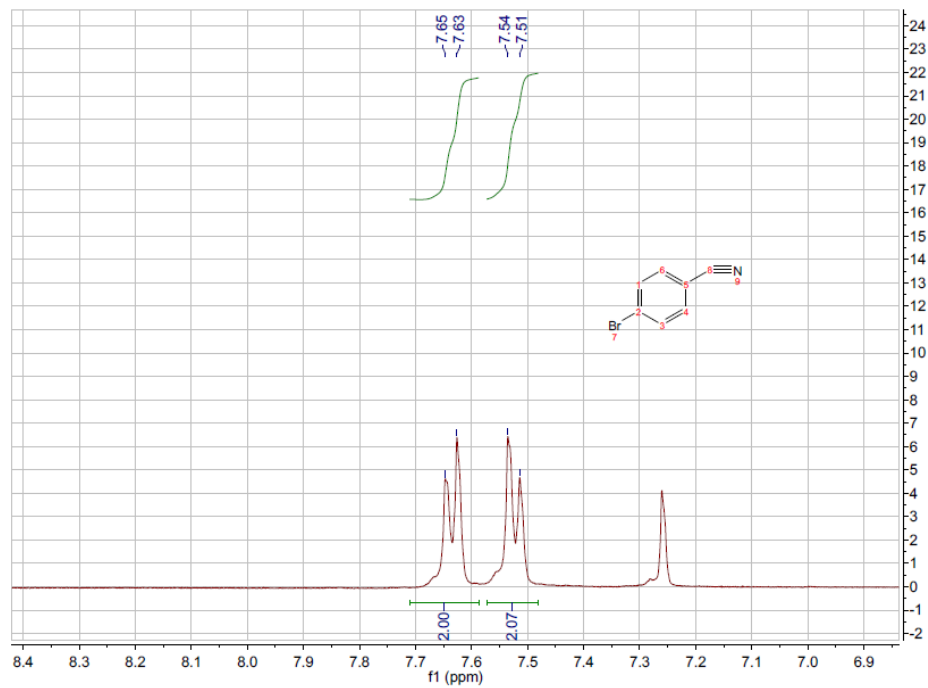

$^{13}\text{C}$  NMR:

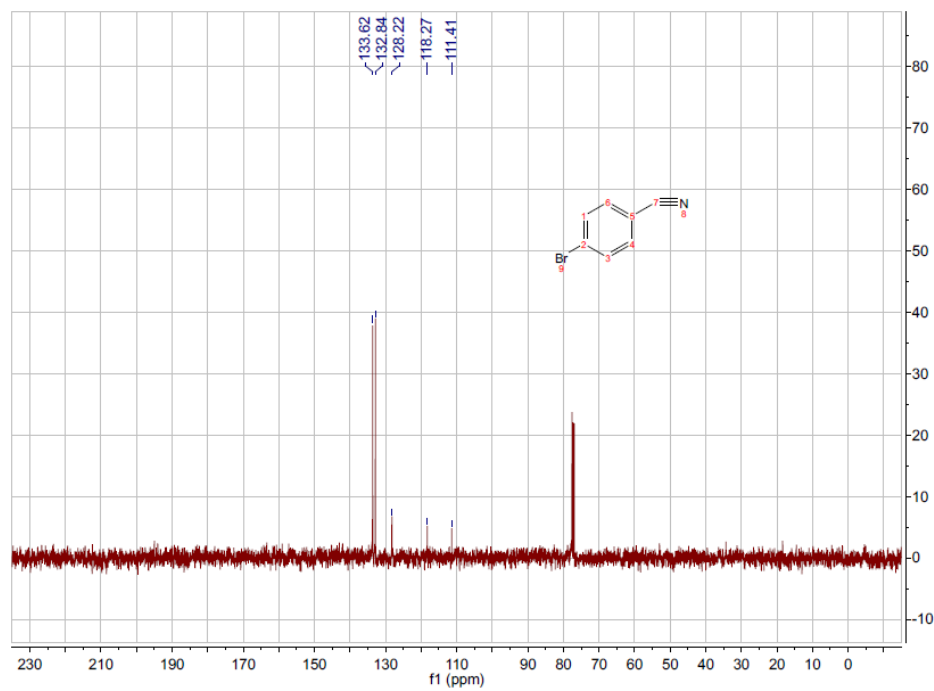

### 3. 2-bromobenzonitrile

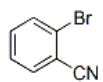

$^1\text{H}$  NMR (400 MHz,  $\text{CDCl}_3$ ):  $\delta = 7.70\text{--}7.66$  (m, 2H),  $7.47\text{--}7.43$  (m, 2H).

$^{13}\text{C}$  NMR (100 MHz,  $\text{CDCl}_3$ ):  $\delta = 115.98, 117.37, 125.47, 133.40, 134.19, 134.54$ .

$^1\text{H}$  NMR:

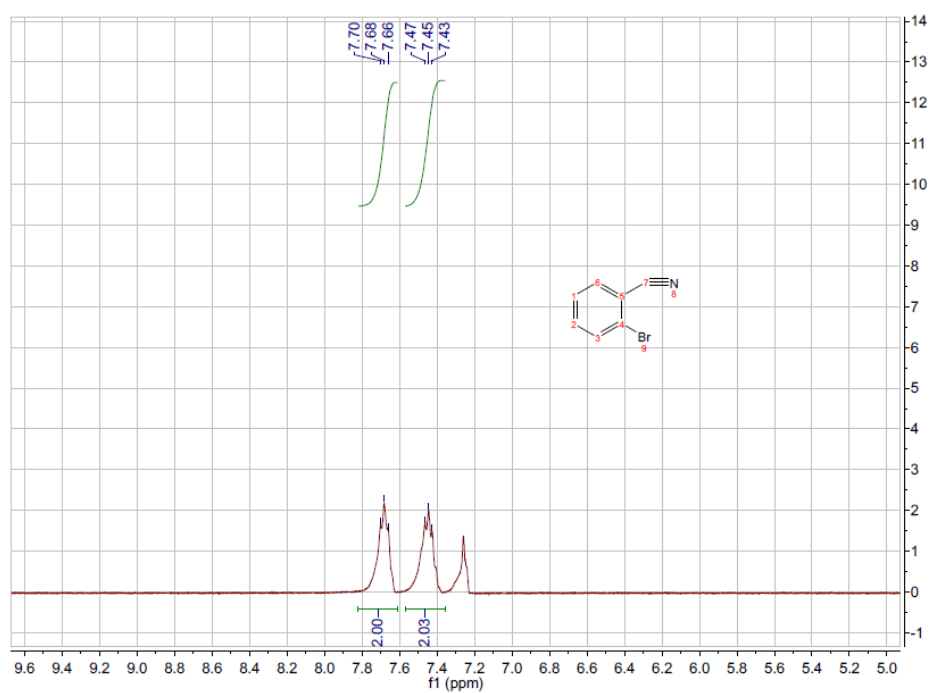

$^{13}\text{C}$  NMR:

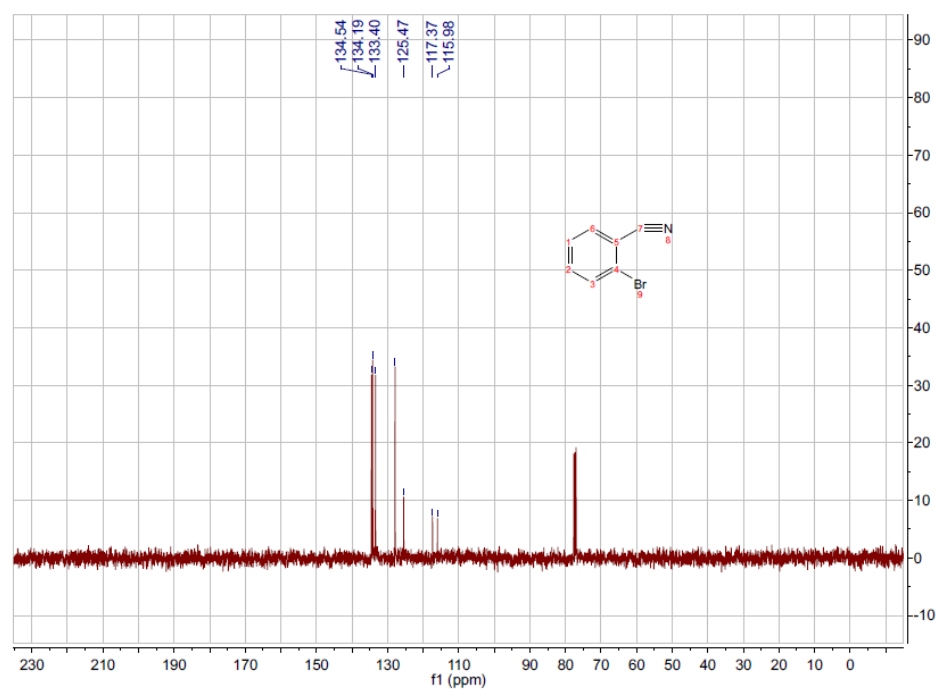

## GC data of the partial products:

1. 4-methylbenzylamine peak position at 5.625 min

Isoquinoline peak position at 8.043 min

*p*-tolunitrile peak position at 5.476 min

4-methylbenzylamine:

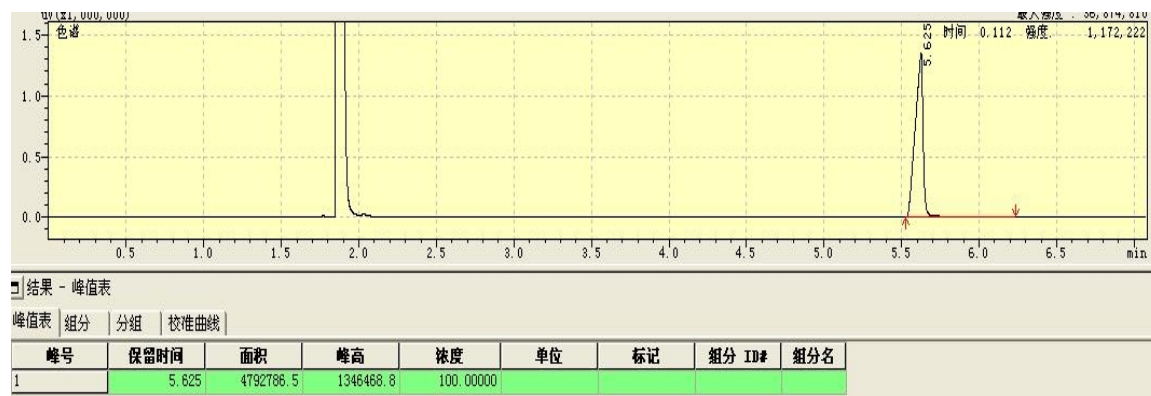

*p*-tolunitrile:

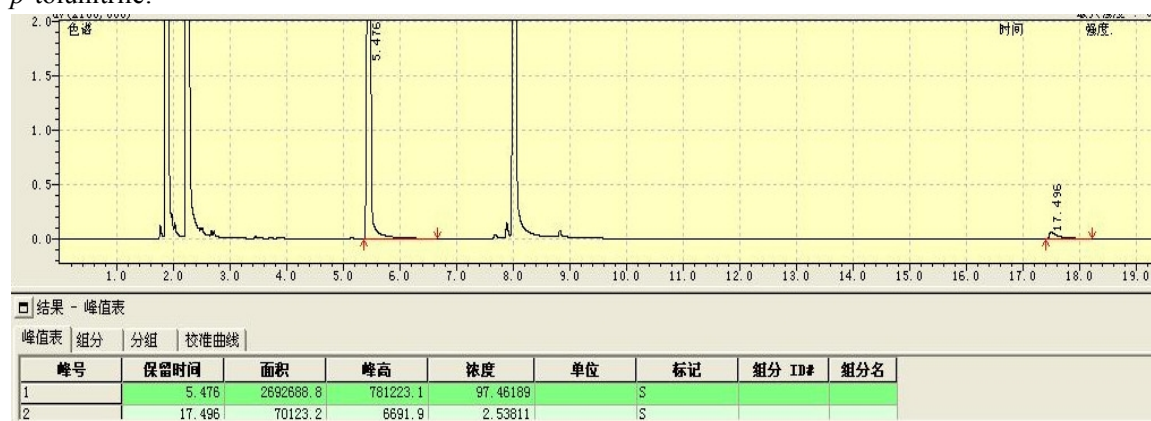

2. 4-chlorobenzylamine peak position at 7.225 min

4-chlorobenzonitrile peak position at 6.101 min

4-chlorobenzylamine:

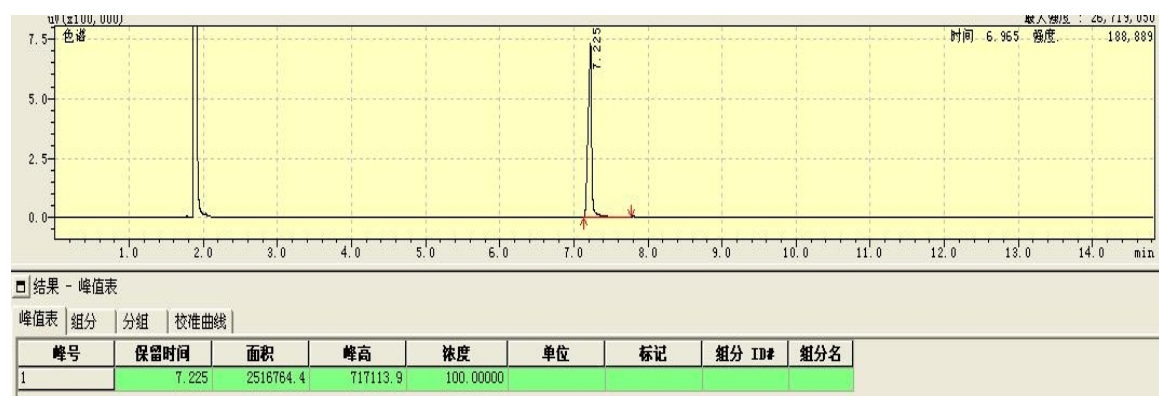

4-chlorobenzonitrile:

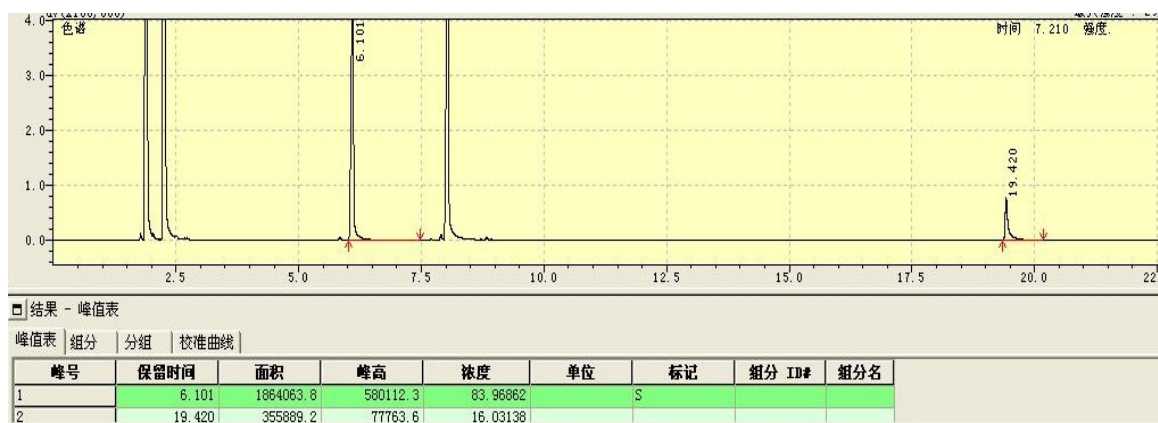

3. 4-methoxy benzylamine peak position at 8.102 min

Anisonitrile peak position at 8.183 min

4-methoxy benzylamine:

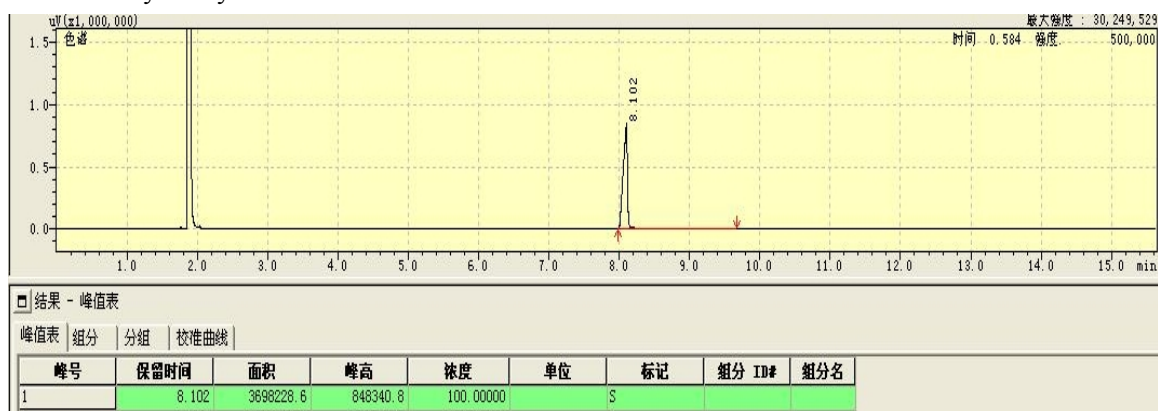

Anisonitrile:

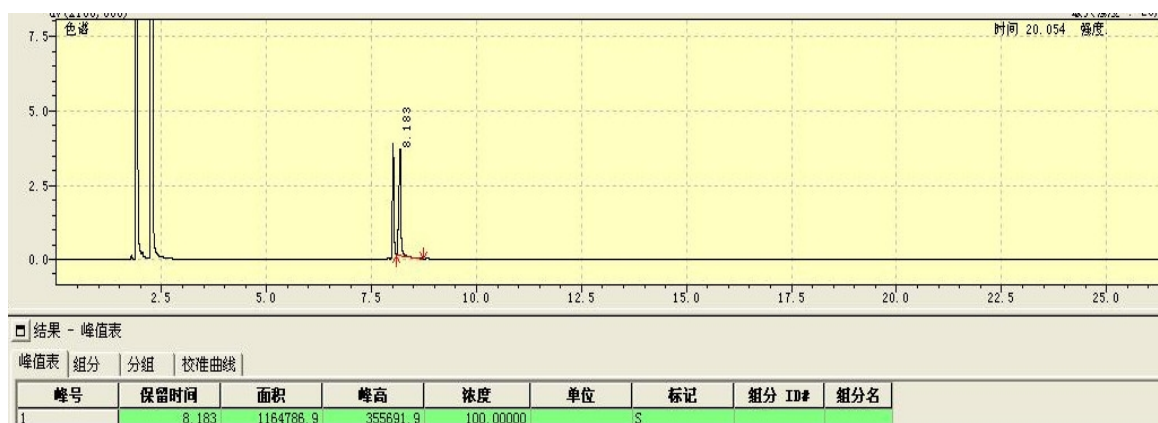

4. C1=CC=C(C=C1)/N=C/C2=CC=C(C=C2) peak position at 17.363 min

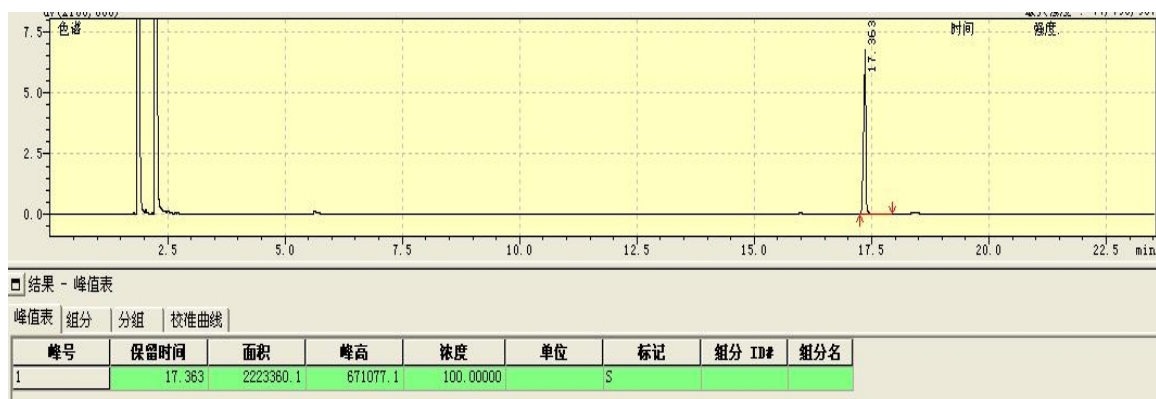

5. ClC1=CC=C(C=C1)/N=C/C2=CC=C(C=C2)Cl peak position at 19.363 min  
 1, 10-phenanthroline peak position at 18.121 min

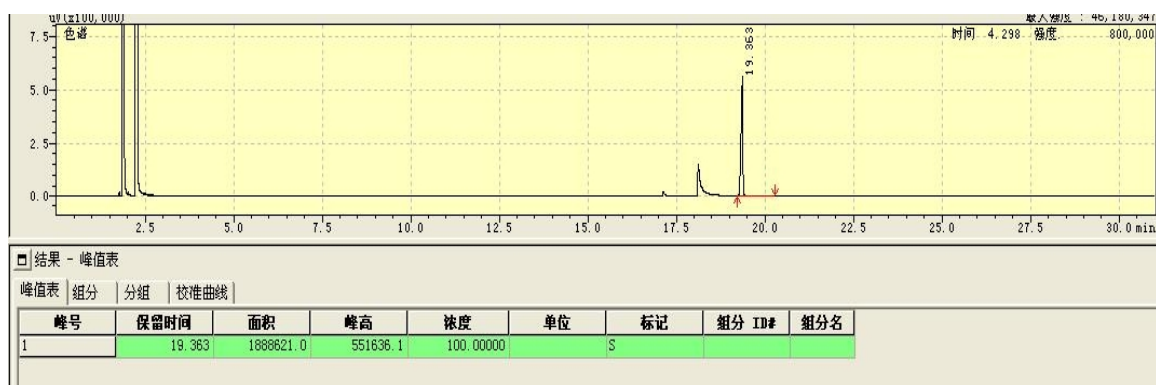

6. COc1ccc(cc1)/N=C/C2=CC=C(OC)C=C2 peak position at 20.745 min

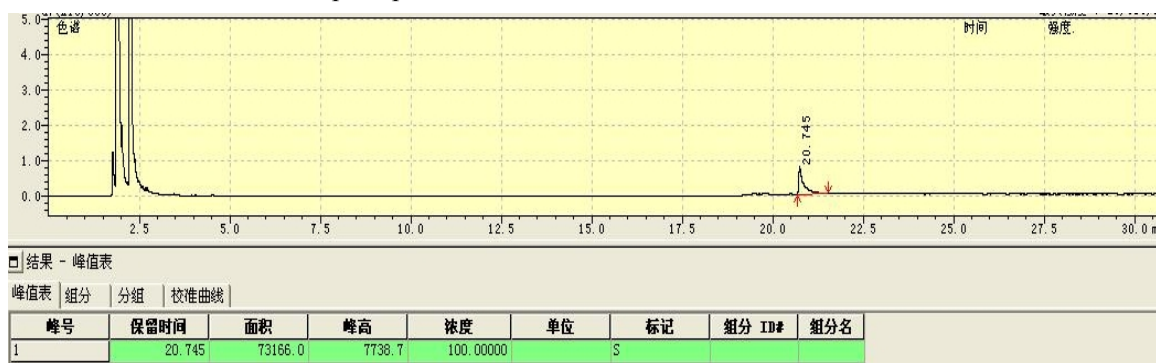

Supplement: c4cc01389a1.pdf [file c4cc01389a1.pdf]
